# Supplementary material for: Cellular mechanisms for cargo delivery and polarity maintenance at different polar domains in plant cells
Source: PubMed Central journal article supplement (PMC4950145; doi:10.1038/celldisc.2016.18), 2016-07-19
Supplement: celldisc201618-s16.pdf [file celldisc201618-s16.pdf]

SFigure 15

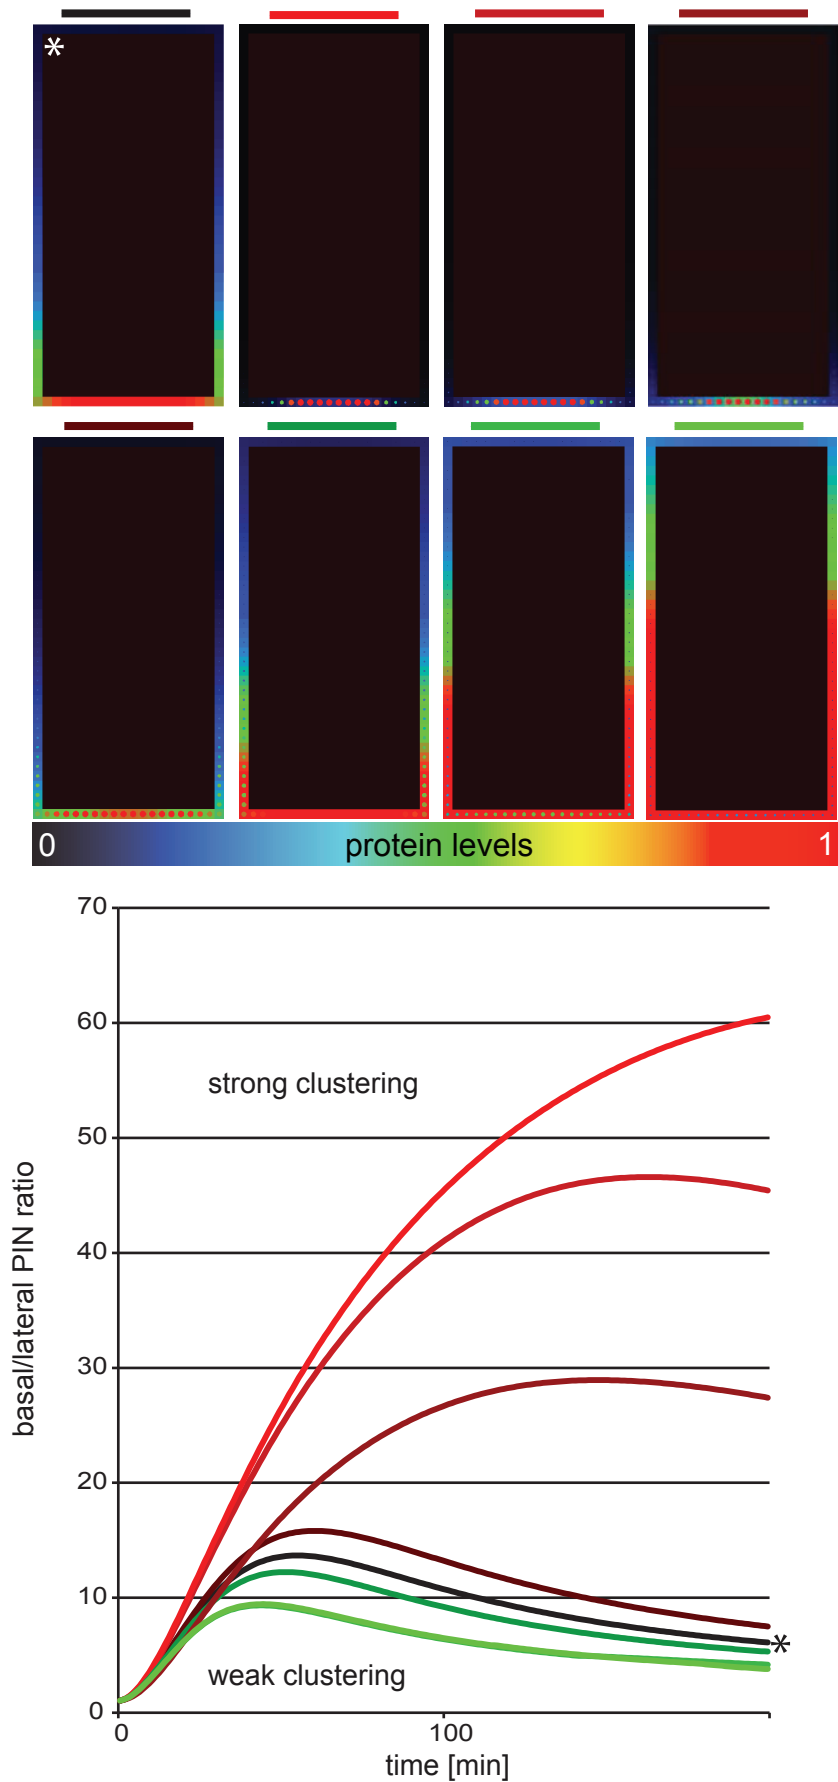

**Supplementary Figure 15.** In Silico Tests of Protein Clustering Impact on the Polarization Dynamics.

(A) Computational simulations representing predicted cell polarity that depends on two factors, lateral diffusion and polar recycling, in the non-polar secretion model (upper panel), and chart representing polarity index profiles (signal ratios between polar and non-polar domains) (lower panel). Since protein clustering may have an effect on lateral diffusion and total protein dynamics within the cells, we tested a broad range of parameters determining clustering degree ( $f_1$ - non-mobile protein fraction). The black coloured line (asterisk) represents default clustering degree ( $f_1 \sim 0.20$ ) that was used in the polar secretion model. Color coding from red to light green represents clustering degree from high ( $f_1 \sim 0.9$ ) to low ( $f_1 \sim 0.1$ ), respectively (for the details see SupplementalSupplementary Methods). Protein levels are represented by color coding scheme, from low (0.0001) to high (1) (log scale).
